# Supplementary material for: 1H-NMR metabolomics analysis of nutritional components from two kinds of freshwater fish brain extracts
Source: Royal Society of Chemistry journal article supplement (doi:10.1039/c8ra02311e), 2018-01-01
Supplement: c8ra02311e1.pdf [file c8ra02311e1.pdf]

**<sup>1</sup>H-NMR metabolomics analysis of nutritional components for two kinds of freshwater fish  
brain extracts**

Hongying Du <sup>a, b, \*</sup>, Jialing Fu <sup>a</sup>, Siqi Wang <sup>a</sup>, Huili Liu <sup>c</sup>, Yongchao Zeng <sup>a</sup>, Jiaren Yang <sup>a</sup>, Shanbai Xiong <sup>a, b</sup>

<sup>a</sup> College of Food Science and Technology, Huazhong Agricultural University, Wuhan, Hubei,  
P.R. China, 430070

<sup>b</sup> National R & D Branch Center for Conventional Freshwater Fish Processing, Wuhan, Hubei,  
P.R. China, 430070

<sup>c</sup> State Key Laboratory of Magnetic Resonance and Atomic and Molecular Physics, Key  
Laboratory of Magnetic Resonance in Biological Systems, Wuhan Center for Magnetic  
Resonance, Wuhan Institute of Physics and Mathematics, Chinese Academy of Sciences, Wuhan  
430071, China

**Short title:** Metabolomic analysis of fish brain extracts

\* Corresponding author: Hongying Du

Email: hydu@mail.hzau.edu.cn, Tel: +86-27-87288375

Table S1. <sup>1</sup>H NMR resonance assignments for fish brain

| <sup>1</sup> H chemical shift (ppm) | Molecule                | Assignment                       |
|-------------------------------------|-------------------------|----------------------------------|
| 1.0126 (d) 0.9816 (d)               | Isoleucine              | <sup>3</sup> CH <sub>3</sub>     |
| 0.9252 (m)                          |                         | <sup>5</sup> CH <sub>3</sub>     |
| 0.9592 (d)                          | Leucine                 | <sup>5</sup> CH <sub>3</sub>     |
| 1.0456 (d)                          | Valine                  | <sup>4</sup> CH <sub>3</sub>     |
| 1.0024 (d)                          |                         | <sup>4</sup> CH <sub>3</sub>     |
| 1.3331 (d)                          | Lactate                 | <sup>3</sup> CH <sub>3</sub>     |
| 4.122 (q)                           |                         | <sup>2</sup> CH                  |
| 1.4704 (d)                          | Alanine                 | <sup>3</sup> CH <sub>3</sub>     |
| 1.7220 (m)                          | Lysine                  | <sup>5</sup> CH <sub>2</sub>     |
| 1.9068 (qu)                         | GABA                    | <sup>3</sup> CH <sub>2</sub>     |
| 2.3023 (t)                          |                         | <sup>4</sup> CH <sub>2</sub>     |
| 3.0189 (t)                          |                         | <sup>2</sup> CH <sub>2</sub>     |
| 1.99 (s)                            | Acetamide               | <sup>2</sup> CH <sub>3</sub>     |
| 2.0248 (s)                          | NAA                     | <sup>2</sup> CH <sub>3</sub>     |
| 2.7000 (dd) 2.5022 (m)              |                         | <sup>3</sup> CH <sub>2</sub>     |
| 2.1354 (m)                          | Glx-Glutamate+Glutamine | <sup>3</sup> CH <sub>2</sub>     |
| 3.7777 (m)                          |                         | <sup>2</sup> CH                  |
| 2.3569 (m)                          | Glutamate               | <sup>4</sup> H <sub>2</sub>      |
| 2.4119 (t)                          | Oxoglutarate            | <sup>4</sup> H <sub>2</sub>      |
| 2.4516 (m)                          | Glutamine               | <sup>4</sup> H <sub>2</sub>      |
| 2.5482 (s)                          | Methylamine             | <sup>1</sup> H <sub>3</sub>      |
| 3.097 (s)                           | Creatine                | N(CH <sub>3</sub> )              |
| 3.9368 (s)                          |                         | <sup>2</sup> CH <sub>2</sub>     |
| 3.1968 (s)                          | Choline                 | N(CH <sub>3</sub> ) <sub>3</sub> |
| 3.2056 (s)                          | Phosphocholine          | N(CH <sub>3</sub> ) <sub>3</sub> |
| 3.4315 (t)                          | Taurine                 | <sup>1</sup> CH <sub>2</sub>     |
| 3.2689 (t)                          |                         | <sup>2</sup> CH <sub>2</sub>     |
| 3.5416 (dd)                         | myo-Inositol            | <sup>1</sup> CH; <sup>3</sup> CH |
| 3.6282 (t)                          |                         | <sup>4</sup> CH; <sup>6</sup> CH |
| 3.5669 (s)                          | Glycine                 | <sup>2</sup> CH <sub>2</sub>     |

Note: S=singlet; d=doublet; t=triplet; q: quartet; qu, quintet; m, other multiplet; superscript number: Carbon position in the chemical structure; subscript number: Proton number in the chemical structure.

Table S2 The statistical analysis of the assigned metabolites in both freshwater fish brains.

| Chemicals    | FJ-ave | FJ-SD | H-Ave  | H-SD  | <i>p</i> -Value | t-Value |
|--------------|--------|-------|--------|-------|-----------------|---------|
| Lactate      | 214.49 | 35.52 | 166.41 | 28.80 | 0.0125          | 2.896   |
| Creatine     | 192.97 | 26.34 | 188.69 | 38.01 | 0.8066          | 0.250   |
| Glycine      | 12.72  | 2.09  | 14.10  | 4.51  | 0.4727          | -0.740  |
| Taurine      | 83.23  | 20.74 | 80.96  | 16.36 | 0.8163          | 0.237   |
| Choline      | 2.16   | 0.58  | 4.13   | 0.60  | 0.0000          | -6.452  |
| Glutamine    | 67.39  | 12.36 | 68.55  | 16.13 | 0.8797          | -0.154  |
| Glutamate    | 26.39  | 2.83  | 30.89  | 5.10  | 0.0593          | -2.067  |
| GABA         | 14.39  | 0.48  | 23.09  | 2.42  | 0.0000          | -9.322  |
| NAA          | 29.97  | 3.46  | 44.83  | 8.18  | 0.0006          | -4.455  |
| Acetamide    | 23.62  | 3.92  | 16.18  | 3.29  | 0.0015          | 3.996   |
| Alanine      | 18.88  | 3.00  | 31.74  | 3.75  | 0.0000          | -7.254  |
| Myo-institol | 74.17  | 35.81 | 54.73  | 13.01 | 0.1742          | 1.437   |

Note: FJ: crucian carp; H: yellow-head catfish; ave: average values ( $\mu\text{mol/g}$ ); SD: standard error deviations.

Fig. S1: Metabolites differences of the represents metabolites of the freshwater fish brain. A: Glutamine, glutamate and GABA; B. NAA (Left) and Acetaline (Right). *Note: Red: yellow catfish; Green: crucian carp.*

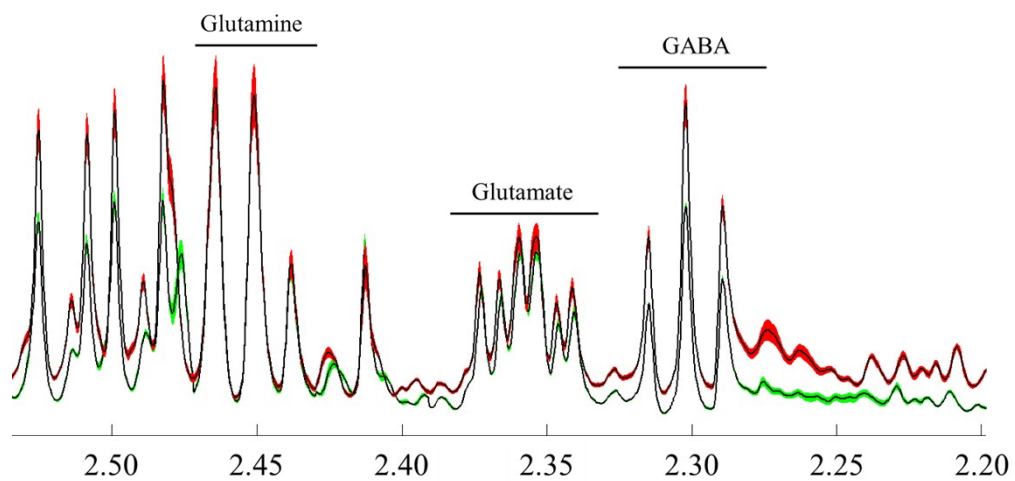

(A)

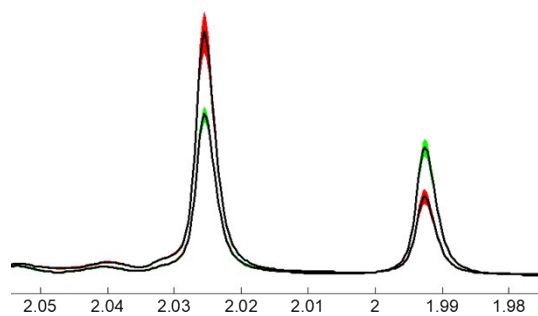

(B)
